# Supplementary material for: Dehydroascorbate induces plant resistance in rice against root‐knot nematode Meloidogyne graminicola
Source: PubMed Central journal article supplement (PMC9366072; doi:10.1111/mpp.13230), 2022-05-19
Supplement: MPP-23-1303-s009.pdf [file MPP-23-1303-s009.pdf]

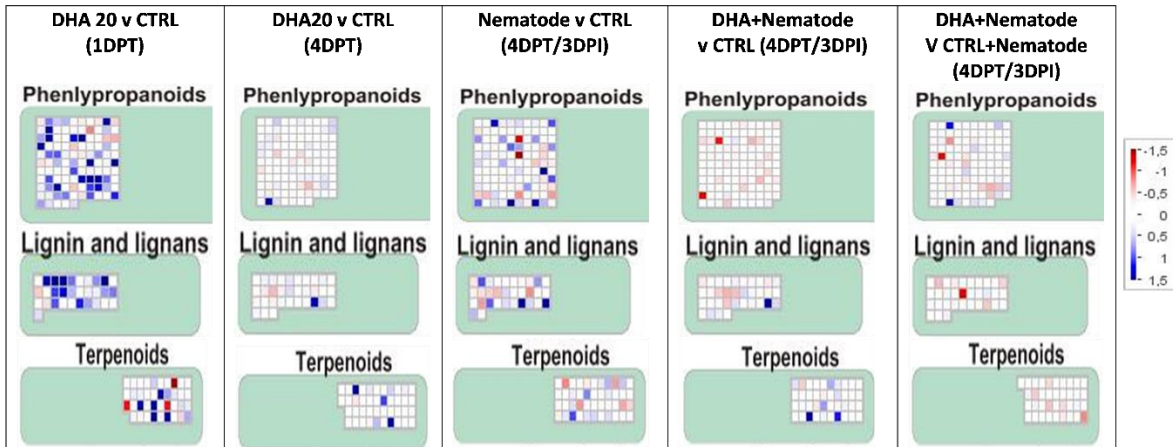

**FIGURE S4** Mapman visualization showing the differential expression pattern in the phenylpropanoid lignin and lignans and terpenoid pathway, based on the Log<sub>2</sub> fold changes of mRNA levels, in DHA 20 mM at 1 and at 4 DPT, nematode infected at 4DPT/3DPI, DHA 20 mM + nematode infected at 4DPT/3DPI rice roots in comparison with roots of mock-treated control plants or mock-treated plus nematode infected control plants. Each square in the display represents one rice transcript annotated by MapMan to belong to this category of genes. A transcript is colored blue if this transcript is induced (Log<sub>2</sub>FC>0) or red if this transcript is repressed (Log<sub>2</sub>FC<0)
