# Supplementary material for: Dehydroascorbate induces plant resistance in rice against root‐knot nematode Meloidogyne graminicola
Source: PubMed Central journal article supplement (PMC9366072; doi:10.1111/mpp.13230), 2022-05-19
Supplement: MPP-23-1303-s012.pdf [file MPP-23-1303-s012.pdf]

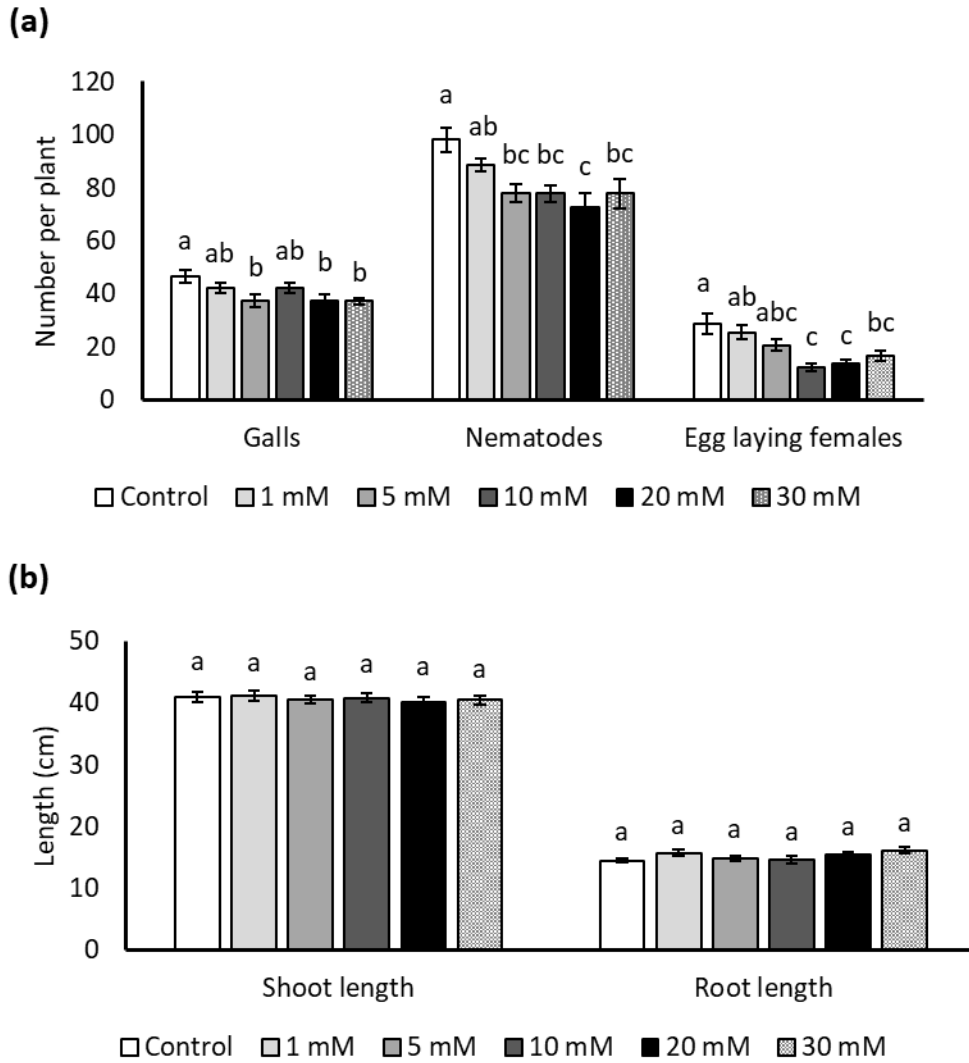

**FIGURE S1** Effect of different concentrations of DHA viz., 1, 5, 10, 20, and 30 mM on plant susceptibility to *Meloidogyne graminicola*. (a) Effect on galls, nematodes, and reproduction of *M. graminicola*. (b) Effect on the shoot and root lengths in rice. Error bars on each column indicate SE from eight replicates. Different letters on error bars within a group indicate a statistically significant difference (Duncan's multiple range test;  $\alpha=0.05$ )
